# Supplementary material for: First-principles calculations of an asymmetric MoO2/graphene nanocomposite as the anode material for lithium-ion batteries
Source: Royal Society of Chemistry journal article supplement (doi:10.1039/d0ra07690b), 2020-01-01
Supplement: d0ra07690b1.pdf [file d0ra07690b1.pdf]

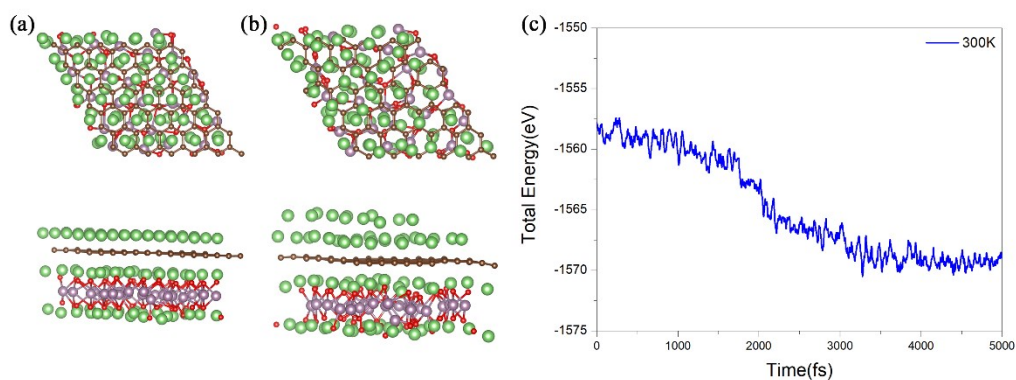

Figure S1. (a) and (b) The structures of MoO<sub>2</sub>/G nanocomposite with three layers Li atoms adsorption before and after 5ps AIMD simulations at 300K. (c) The total energy shifts with time of AIMD simulation at 300 K.
